# Supplementary material for: Implementation of data access and use procedures in clinical data warehouses. A systematic review of literature and publicly available policies
Source: PubMed Central journal article supplement (PMC7353743; doi:10.1186/s12911-020-01177-z), 2020-07-11
Supplement: 12911_2020_1177_MOESM1_ESM.pdf [file 12911_2020_1177_MOESM1_ESM.pdf]

Supplement table 1 List of CDW found in the Google search

| No. | CDW                                                                                    | WEBPAGE LINK                                                                                                                                                                                                                          | POLICY |
|-----|----------------------------------------------------------------------------------------|---------------------------------------------------------------------------------------------------------------------------------------------------------------------------------------------------------------------------------------|--------|
| 1   | University of Chicago Center for Research Informatics Clinical Research Data Warehouse | <a href="http://cri.uchicago.edu/crdw/">http://cri.uchicago.edu/crdw/</a>                                                                                                                                                             | N/A    |
| 2   | Stanford Medicine Research Informatics Center                                          | <a href="http://med.stanford.edu/ric.html">http://med.stanford.edu/ric.html</a>                                                                                                                                                       | N/A    |
| 3   | UTHealth                                                                               | <a href="https://sbmi.uth.edu/uth-big/clinical-data-warehouse/index.htm">https://sbmi.uth.edu/uth-big/clinical-data-warehouse/index.htm</a>                                                                                           | N/A    |
| 4   | University of Arizona Health Sciences                                                  | <a href="https://cb2.uahs.arizona.edu/clinical-data-warehouse">https://cb2.uahs.arizona.edu/clinical-data-warehouse</a>                                                                                                               | N/A    |
| 5   | Emory Healthcare                                                                       | <a href="http://it.emory.edu/ClinicalResearchData/index.html">http://it.emory.edu/ClinicalResearchData/index.html</a>                                                                                                                 | N/A    |
| 6   | UNC Health Care                                                                        | <a href="https://tracs.unc.edu/index.php/services/informatics-and-data-science/cdw-h">https://tracs.unc.edu/index.php/services/informatics-and-data-science/cdw-h</a>                                                                 | N/A    |
| 7   | University of New Mexico School of Medicine                                            | <a href="https://hsc.unm.edu/research/ctsc/informatics/data-warehouse.html">https://hsc.unm.edu/research/ctsc/informatics/data-warehouse.html</a>                                                                                     | N/A    |
| 8   | Arkansas Clinical Data Repository                                                      | <a href="https://tri.uams.edu/tri-services/arkansas-clinical-data-repository-3/">https://tri.uams.edu/tri-services/arkansas-clinical-data-repository-3/</a>                                                                           | N/A    |
| 9   | University of Minnesota Clinical Data Repository                                       | <a href="https://www.ctsi.umn.edu/researcher-resources/clinical-data-repository">https://www.ctsi.umn.edu/researcher-resources/clinical-data-repository</a>                                                                           | N/A    |
| 10  | Health Sciences South Carolina                                                         | <a href="https://www.healthsciencessc.org/tools-services/tool/clinical-data-warehouse/219">https://www.healthsciencessc.org/tools-services/tool/clinical-data-warehouse/219</a>                                                       | N/A    |
| 11  | Vanderbilt University Medical Center                                                   | <a href="https://www.vumc.org/dbmi/research-data-warehousing">https://www.vumc.org/dbmi/research-data-warehousing</a>                                                                                                                 | N/A    |
| 12  | Rutgers Cancer Institute of New Jersey                                                 | <a href="https://gemini.cinj.rutgers.edu/projects/clinical-data-warehouse/">https://gemini.cinj.rutgers.edu/projects/clinical-data-warehouse/</a>                                                                                     | N/A    |
| 13  | University of Illinois at Chicago                                                      | <a href="http://www.ccts.uic.edu/content/requesting-data-extracts-irb-requirements">http://www.ccts.uic.edu/content/requesting-data-extracts-irb-requirements</a>                                                                     | N/A    |
| 14  | Star Data Warehouse                                                                    | <a href="https://ictr.johnshopkins.edu/programs_resources/programs-resources/informatics/epic-cogito-data-warehouse/">https://ictr.johnshopkins.edu/programs_resources/programs-resources/informatics/epic-cogito-data-warehouse/</a> | N/A    |

Based on the Google.de query "clinical data warehouse", first 10 pages, sorted by relevance (default)
