# Supplementary material for: Implementation of data access and use procedures in clinical data warehouses. A systematic review of literature and publicly available policies
Source: PubMed Central journal article supplement (PMC7353743; doi:10.1186/s12911-020-01177-z), 2020-07-11
Supplement: 12911_2020_1177_MOESM2_ESM.pdf [file 12911_2020_1177_MOESM2_ESM.pdf]

Supplement table 2 Included literature and policies

| No. | FIRST AUTHOR | YEAR OF PUBLICATION | JOURNAL                                      | TITLE                                                                                                                                                                                  | POLICY ON WEB                                                                                                                                                    |
|-----|--------------|---------------------|----------------------------------------------|----------------------------------------------------------------------------------------------------------------------------------------------------------------------------------------|------------------------------------------------------------------------------------------------------------------------------------------------------------------|
| 1.  | Bouzille     | 2017                | Medinfo                                      | Sharing Health Big Data for Research - A Design by Use Cases: The INSHARE Platform Approach                                                                                            | N/A                                                                                                                                                              |
| 2.  | Chute        | 2010                | Am Med Inform Assoc                          | The Enterprise Data Trust at Mayo Clinic: a semantically integrated warehouse of biomedical data                                                                                       | N/A                                                                                                                                                              |
| 3.  | Des Jardins  | 2014                | EGEMS                                        | The Keys to Governance and Stakeholder Engagement: The Southeast Michigan Beacon Community Case Study                                                                                  | N/A                                                                                                                                                              |
| 4.  | Fleischmann  | 2014                | EGEMS                                        | The Visit-Data Warehouse: Enabling Novel Secondary Use of Health Information Exchange Data                                                                                             | "Healthix Security Policies and Procedures", <a href="https://healthix.org/who-we-are/healthix-policies/">https://healthix.org/who-we-are/healthix-policies/</a> |
| 5.  | Foran        | 2017                | Cancer Informatics                           | Roadmap to a Comprehensive Clinical Data Warehouse for Precision Medicine Applications in Oncology                                                                                     | N/A                                                                                                                                                              |
| 6.  | Ford         | 2009                | BMC Health Services Research                 | The SAIL Databank: building a national architecture for e-health research and evaluation                                                                                               | N/A                                                                                                                                                              |
| 7.  | Grant        | 2006                | International Journal of Medical Informatics | Integrating feedback from a clinical data warehouse into practice organisation                                                                                                         | N/A                                                                                                                                                              |
| 8.  | Haarbrandt   | 2018                | Methods Inf Med.                             | HiGHmed – An Open Platform Approach to Enhance Care and Research across Institutional Boundaries                                                                                       | N/A                                                                                                                                                              |
| 9.  | Hazlehurst   | 2015                | International Journal of Medical Informatics | CER Hub: An informatics platform for conducting comparative effectiveness research using multi-institutional, heterogeneous, electronic clinical data                                  | N/A                                                                                                                                                              |
| 10. | Horvath      | 2010                | Journal of Biomedical Informatics            | The DEDUCE Guided Query tool: Providing simplified access to clinical data for research and quality improvement                                                                        | N/A                                                                                                                                                              |
| 11. | Jannot       | 2017                | International Journal of Medical Informatics | The Georges Pompidou University Hospital Clinical Data Warehouse: A 8-years follow-up experience                                                                                       | N/A                                                                                                                                                              |
| 12. | Laws         | 2014                | EGEMS                                        | The Community Health Applied Research Network (CHARN) Data Warehouse: a Resource for Patient-Centered Outcomes Research and Quality Improvement in Underserved, Safety Net Populations | N/A                                                                                                                                                              |

|               |      |                                 |                                                                                                                                                                                                                             |     |
|---------------|------|---------------------------------|-----------------------------------------------------------------------------------------------------------------------------------------------------------------------------------------------------------------------------|-----|
| 13. Lowe      | 2009 | AMIA 2009 Symposium Proceedings | STRIDE – An Integrated Standards-Based Translational Research Informatics Platform                                                                                                                                          | N/A |
| 14. Liu       | 2009 | AMIA 2009 Symposium Proceedings | Toward a Fully De-identified Biomedical Information Warehouse                                                                                                                                                               | N/A |
| 15. Perera    | 2016 | BMJ Open                        | Cohort profile of the South London and Maudsley NHS Foundation Trust Biomedical Research Centre (SLaM BRC) Case Register: current status and recent enhancement of an Electronic Mental Health Record-derived data resource | N/A |
| 16. Prasser   | 2018 | Methods Inf Med.                | Data Integration for Future Medicine (DIFUTURE)                                                                                                                                                                             | N/A |
| 17. Prokosch  | 2018 | Methods Inf Med                 | MIRACUM: Medical Informatics in Research and Care in University Medicine                                                                                                                                                    | N/A |
| 18. Ross      | 2014 | EGEMS                           | The HMO Research Network Virtual Data Warehouse: A Public Data Model to Support Collaboration                                                                                                                               | N/A |
| 19. Stark     | 2010 | Journal of Dental Education     | Consortium for Oral Health-Related Informatics: Improving Dental Research, Education, and Treatment                                                                                                                         | N/A |
| 20. Turley    | 2016 | EDM Forum                       | Leveraging a Statewide Clinical Data Warehouse to Expand Boundaries of the Learning Health System                                                                                                                           | N/A |
| 21. Van Eaton | 2014 | EGEMS                           | Achieving and Sustaining Automated Health Data Linkages for Learning Systems: Barriers and Solutions                                                                                                                        | N/A |
| 22. Walij     | 2014 | Am Med Inform Assoc             | BigMouth: a multi-institutional dental data repository                                                                                                                                                                      | N/A |
| 23. Winter    | 2018 | Methods Inf Med                 | Smart Medical Information Technology for Healthcare (SMITH)* Data Integration based on Interoperability Standards                                                                                                           | N/A |
